# Supplementary material for: Lifespan Extending and Oxidative Stress Resistance Properties of a Leaf Extracts from Anacardium occidentale L. in Caenorhabditis elegans
Source: Hindawi journal article supplement (doi:10.1155/2019/9012396), 2019-06-02
Supplement: f1 [file 9012396.f1.pdf]

## Supplementary Materials

### **Lifespan extending and oxidative stress resistance properties of a leaf extracts from *Anacardium occidentale* L. in *Caenorhabditis elegans***

Chatrawee Duangjan,<sup>1,2,3</sup> Panthakarn Rangsinth,<sup>1,2,3</sup> Xiaojie Gu,<sup>2,4</sup> Michael Wink,<sup>2\*</sup> and Tewin Tencomnao,<sup>1,3\*</sup>

#### **\* Corresponding authors**

<sup>1</sup>Graduate Program in Clinical Biochemistry and Molecular Medicine, Department of Clinical Chemistry, Faculty of Allied Health Sciences, Chulalongkorn University, Bangkok 10330, Thailand

<sup>2</sup>Institute of Pharmacy and Molecular Biotechnology, Im Neuenheimer Feld 364, Heidelberg University, 69120 Heidelberg, Germany. Wink@uni-heidelberg.de

<sup>3</sup>Age-Related Inflammation and Degeneration Research Unit, Department of Clinical Chemistry, Faculty of Allied Health Sciences, Chulalongkorn University, Bangkok, 10330, Thailand. tewin.t@chula.ac.th

<sup>4</sup>Department of Biotechnology, School of Environmental and Chemical Engineering, Dalian Jiaotong University, Dalian 116028, China

## Supplementary Table and Figure

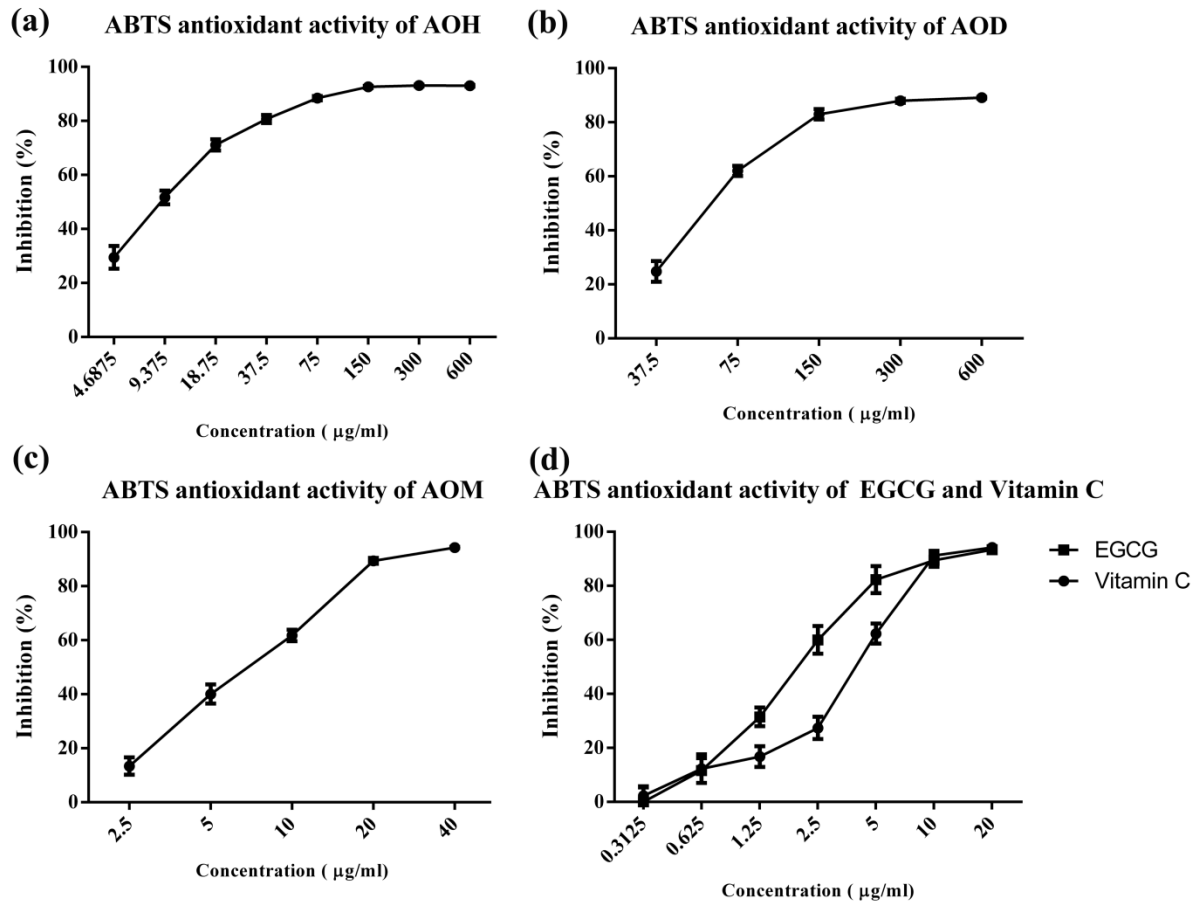

**Supplementary Figure S1.** ABTS radical scavenging activity of AOH (4.69-600 µg/mL)(a), AOD (37.5-600 µg/mL)(b), AOM (2.5-40 µg/mL)(c), EGCG and vitamin C (0.31-20 µg/mL)(d).

**(a) DPPH antioxidant activity of AOM** **(b) DPPH antioxidant activity of EGCG and Vitamin C**

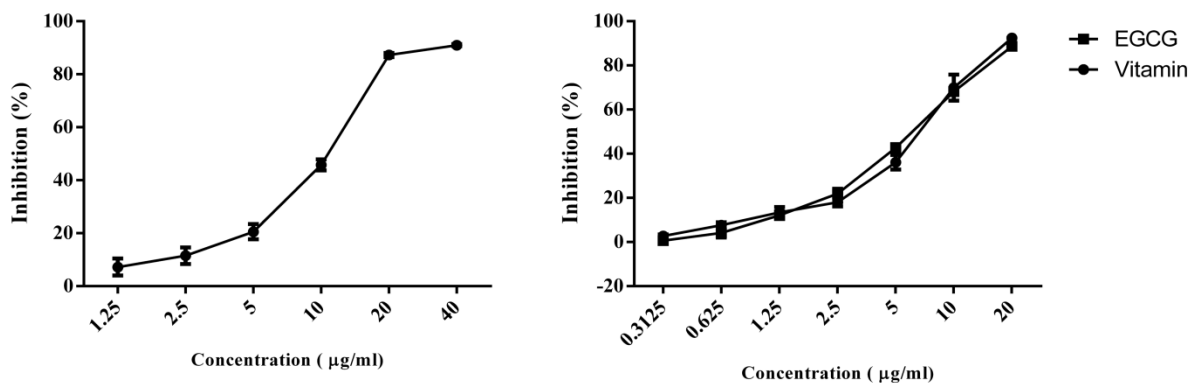

**Supplementary Figure S2.** DPPH radical scavenging activity of AOM (1.25-40 µg/mL)(a), EGCG and vitamin C (0.31-20 µg/mL)(b).

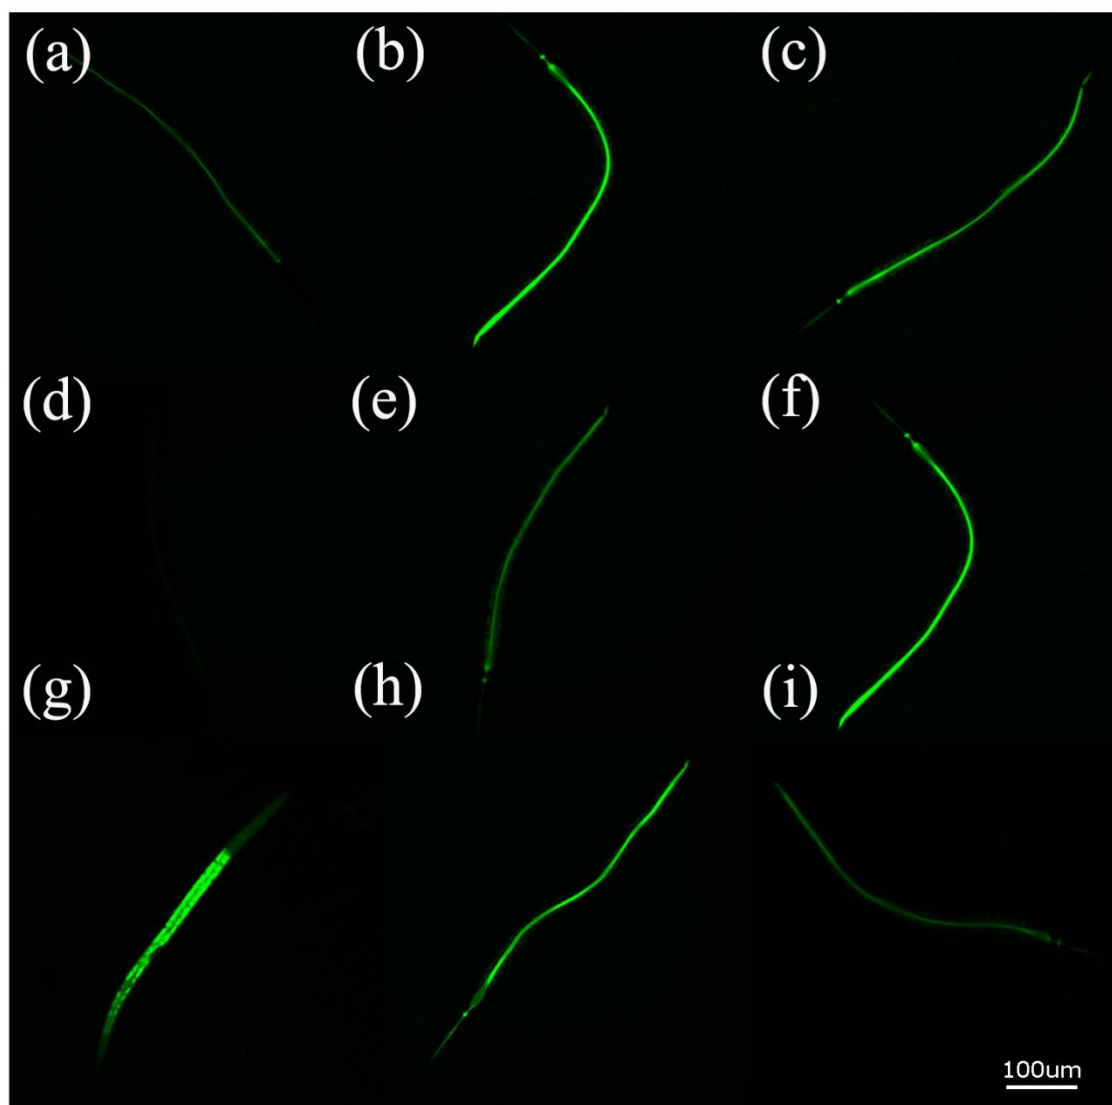

**Supplementary Figure S3.** Representative pictures of DCFDA fluorescence in worms treated with 25 µg/mL AOH (a); 50 µg/mL AOH (b); 100 µg/mL AOH (c); 1 µg/mL AOM (d); 2.5 µg/mL AOM (e); 5 µg/mL AOM (f); Untreated control (g); DMSO solvent control (h); and 25 µg/mL EGCG (i).

AO extracts showed lower levels of ROS in N2 worms when compared to the DMSO control group. DMSO and EGCG were used as a solvent control and positive control group, respectively.

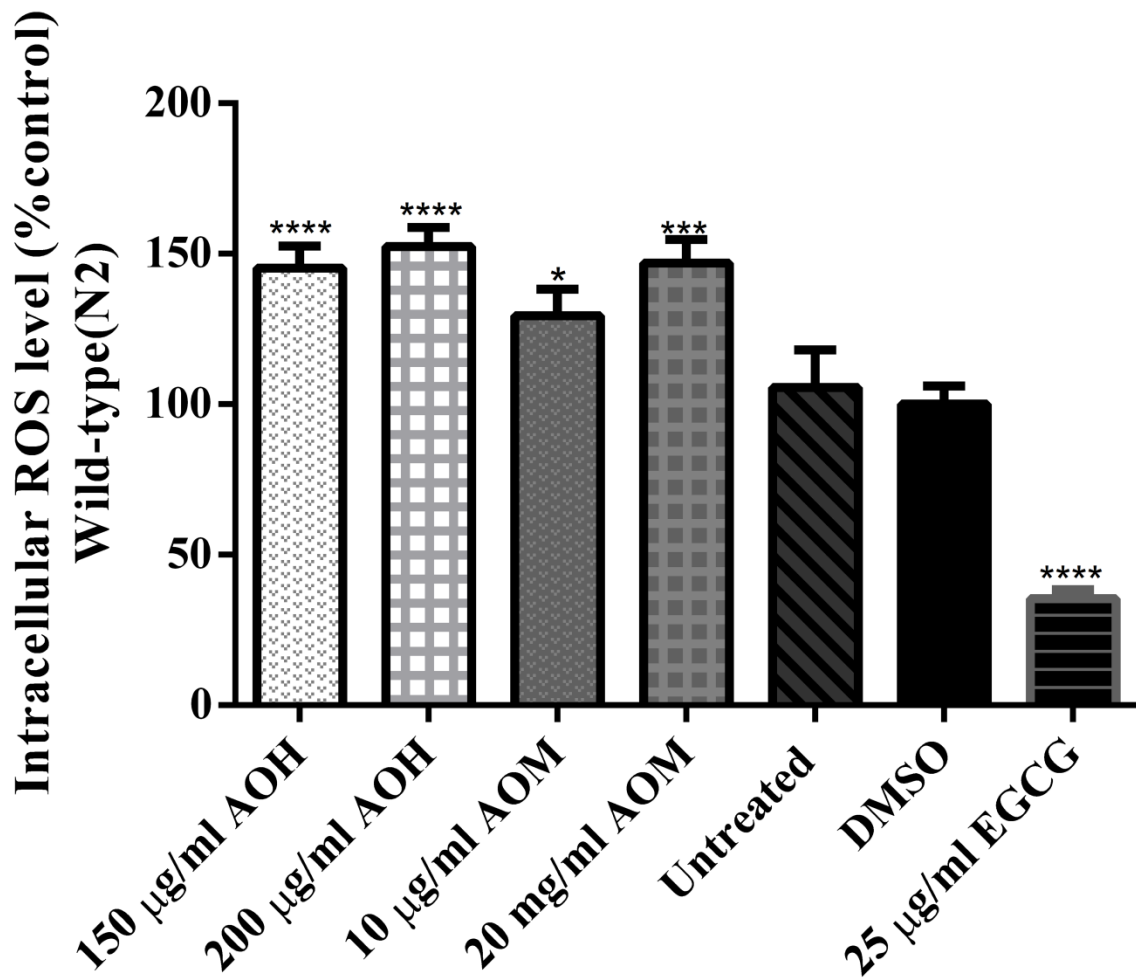

**Supplementary Figure S4. Pro-oxidant effect of AO extracts on intracellular ROS in wild-type worms.** High concentrations of AO extracts (150 and 200 µg/mL AOH; 10 and 20 µg/mL AOM) treatment increased ROS levels in N2 worms when compared to the DMSO control group. Data are presented as the mean  $\pm$  SEM (n = 80, replicated three times). \*p < 0.05, \*\*p < 0.01, \*\*\*p < 0.001 and \*\*\*\*p < 0.0001, compared to the DMSO control by one-way ANOVA following Bonferroni's method (post hoc).

**Supplementary Table S1. Proposed phytochemical constituents in the AO hexane extract using GC-MS**

| Peak No. | Rt(min) | Area (%) | Proposed compound                                                   | Match | Prob.   |
|----------|---------|----------|---------------------------------------------------------------------|-------|---------|
| 1        | 19.0080 | 1.565    | Copaene                                                             | 926   | 33.1000 |
| 2        | 20.0990 | 0.457    | Caryophyllene                                                       | 942   | 32.7000 |
| 5        | 22.0240 | 0.175    | Heneicosane                                                         | 824   | 11.4000 |
| 9        | 23.5000 | 0.389    | Heneicosane                                                         | 901   | 15.9000 |
| 22       | 33.3660 | 41.807   | n-Hexadecanoic acid or Palmitic acid                                | 893   | 68.8000 |
| 25       | 34.8150 | 0.801    | Phytol                                                              | 824   | 23.1000 |
| 28       | 36.2450 | 19.606   | 9,12,15-Octadecatrienoic acid, (Z,Z,Z)- or $\alpha$ -Linolenic acid | 833   | 40.6000 |
| 29       | 36.5020 | 6.914    | Octadecanoic acid or Stearic acid                                   | 875   | 87.5000 |
| 31       | 37.8220 | 0.345    | Monounsaturated anacardic acid                                      | 788   | 9.2000  |

Library: MAINLIB

**Supplementary Table S2. Proposed phytochemical constituents in the AO methanol extract using LC-MS**

| Peak No. | Rt (min) | [M + H] <sup>+</sup> (m/z) | Area (%) | Proposed compound                     | Theoretical mass | Mass error (ppm) |
|----------|----------|----------------------------|----------|---------------------------------------|------------------|------------------|
| 17       | 2.3      | 139.0395                   | 2.0142   | Salicylic acid                        | 138.0320         | 3                |
| 26       | 3.7      | 166.0856                   | 1.4076   | L-Phenylalanine                       | 165.0790         | 3                |
| 71       | 9.2      | 465.1032                   | 4.0410   | Quercetin 3-O-glucoside               | 464.0960         | 0                |
| 72       | 9.3      | 617.1136                   | 1.3883   | Quercetin 3-(2-galloylglucoside)      | 616.1060         | 0                |
| 77       | 9.6      | 435.0922                   | 2.0603   | Quercetin 3-arabinoside               | 434.0850         | 0                |
| 80       | 9.7      | 449.1078                   | 1.6803   | Quercitrin / Kaempferol-7-O-glucoside | 448.1010         | 0                |
| 116      | 13.4     | 279.1587                   | 7.4592   | $\alpha$ -CEHC,tocopherols            | 278.1528         | 1                |

Database: METLIN (CA, USA) and KNApSAcK Keyword Search Web Version 1.000.01

**Supplementary Table 3. Effect of AO extracts on markers of aging and development in *C. elegans***

| Extract                  | Brood size(mean egg lay) | Body length (mean length ( $\mu\text{m}$ )) |
|--------------------------|--------------------------|---------------------------------------------|
| DMSO reagent control     | 245.5 $\pm$ 33.50        | 1517 $\pm$ 18.97                            |
| 25 $\mu\text{g/ml}$ AOH  | 245.3 $\pm$ 22.34        | 1422 $\pm$ 27.94                            |
| 50 $\mu\text{g/ml}$ AOH  | 235.0 $\pm$ 38.23        | 1423 $\pm$ 34.87                            |
| 100 $\mu\text{g/ml}$ AOH | 238.3 $\pm$ 14.68        | 1506 $\pm$ 15.70                            |
| 25 $\mu\text{g/ml}$ AOD  | 270.3 $\pm$ 10.22        | 1502 $\pm$ 13.74                            |
| 50 $\mu\text{g/ml}$ AOD  | 199.3 $\pm$ 8.179        | 1469 $\pm$ 25.86                            |
| 100 $\mu\text{g/ml}$ AOD | 270.8 $\pm$ 3.198        | 1468 $\pm$ 15.16                            |
| 1 $\mu\text{g/ml}$ AOM   | 247.8 $\pm$ 12.24        | 1591 $\pm$ 19.79                            |
| 2.5 $\mu\text{g/ml}$ AOM | 275.5 $\pm$ 5.50         | 1444 $\pm$ 18.23                            |
| 5 $\mu\text{g/ml}$ AOM   | 220.0 $\pm$ 11.27        | 1494 $\pm$ 17.70                            |

*AOH*; AO hexane extract, *AOD*; AO dichloromethane extract, *AOM*; AO methanol extract  
(Results are means  $\pm$  SEM)

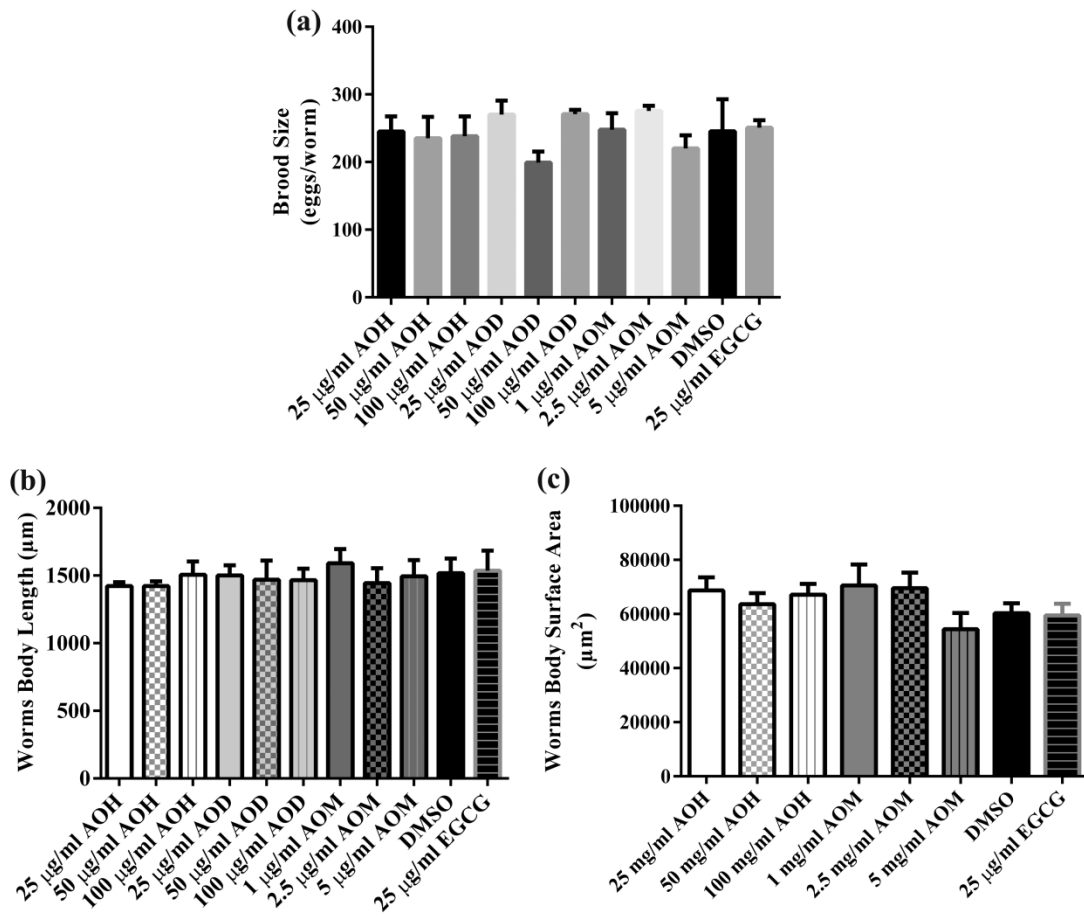

**Supplementary Figure S5.** (a) Brood size (wt), (b) body length (wt) and (c) body surface area (BA17) of worms after AO extracts treatment. Treatment with AO had no effect on egg laying activity, body length and body surface area. The results are expressed as the mean  $\pm$  SEM from three independent experiments ( $n = 30$ ). Treatment groups are compared to the DMSO control by one-way ANOVA following Bonferroni's method (post hoc).



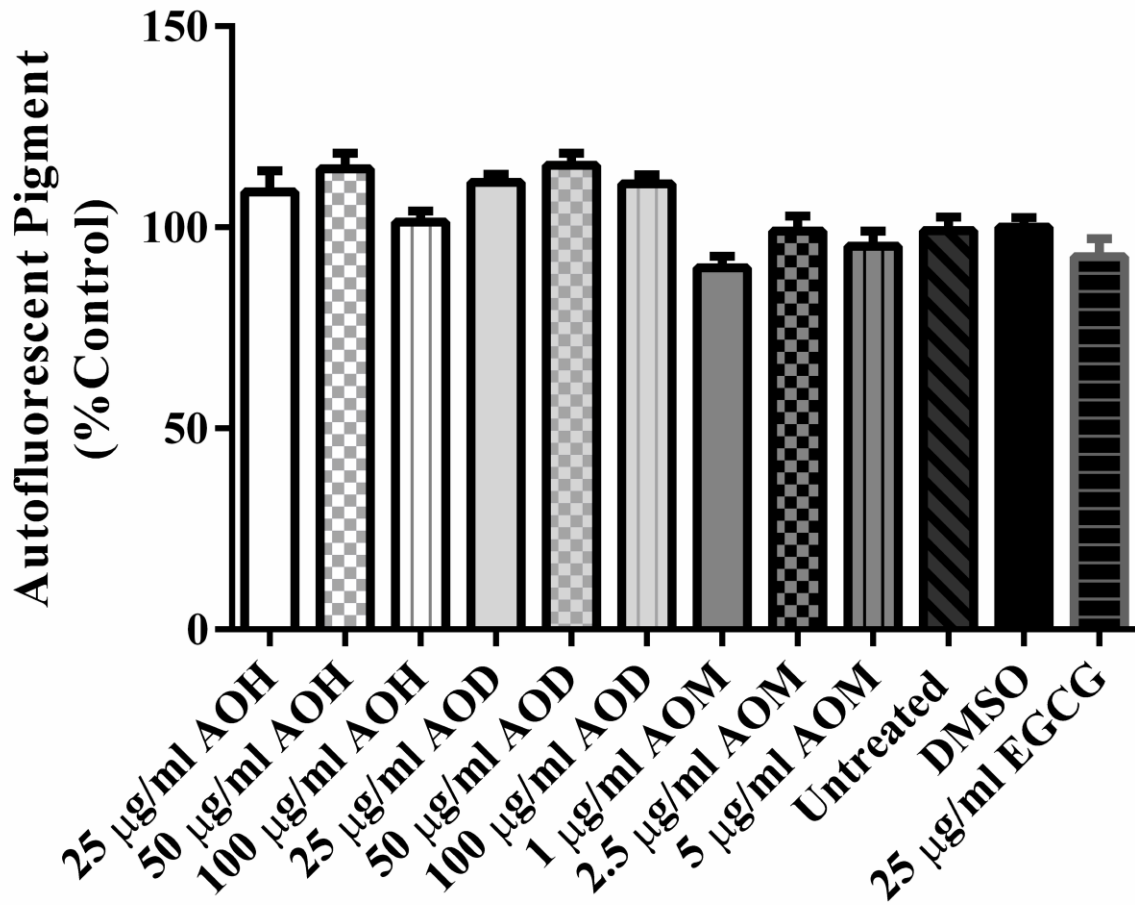

**Supplementary Figure S6.** AO extracts treatment had no effect on autofluorescent pigment expression. The fluorescent intensity in the worms was not affected by EGCG, DMSO and AO extracts treatment. Data are presented as the mean  $\pm$  SEM (n = 100), compared to the untreated control by one-way ANOVA following Bonferroni's method (pos thoc).

**Supplementary Table.4 Results and statistical analyses of the AO extracts treated *C. elegans* in lifespan assay**

| Strain | Treatment     | Mean life span (day) $\pm$ SE | Maximum         | Percentage of increased | P value      | P value summary | Number of worms | Number of censored |
|--------|---------------|-------------------------------|-----------------|-------------------------|--------------|-----------------|-----------------|--------------------|
|        |               |                               | lifespan (days) | lifespan (vs control)   | (vs control) |                 |                 |                    |
| N2     | DMSO control  | 14.28 $\pm$ 0.36              |                 |                         |              |                 | N=120           | N=8                |
| N2     | 25 mg/ml AOH  | 14.91 $\pm$ 0.31              | 26              | 4.41                    | 0.13         | ns              | N=126           | N=18               |
| N2     | 50 mg/ml AOH  | 17.18 $\pm$ 0.44              | 33              | 20.31                   | < 0.0001     | ****            | N=137           | N=8                |
| N2     | 100 mg/ml AOH | 15.04 $\pm$ 0.44              | 26              | 5.32                    | 0.27         | ns              | N=126           | N=2                |
| N2     | 1 mg/ml AOM   | 14.76 $\pm$ 0.47              | 29              | 3.36                    | 0.01         | **              | N=107           | N=22               |
| N2     | 2.5 mg/ml AOM | 14.63 $\pm$ 0.43              | 29              | 2.45                    | 0.27         | ns              | N=104           | N=9                |
| N2     | 5 mg/ml AOM   | 15.16 $\pm$ 0.49              | 34              | 6.16                    | 0.21         | ns              | N=111           | N=9                |
|        |               |                               |                 |                         |              |                 |                 |                    |
| TK22   | DMSO control  | 9.67 $\pm$ 0.41               |                 |                         |              |                 | N=33            | N=4                |
| TK22   | 25 mg/ml AOH  | 9.58 $\pm$ 0.30               | 15              | -0.91                   | 0.26         | ns              | N=38            | N=2                |
| TK22   | 50 mg/ml AOH  | 9.97 $\pm$ 0.47               | 16              | 3.16                    | 0.85         | ns              | N=36            | N=2                |
| TK22   | 100 mg/ml AOH | 10.76 $\pm$ 0.60              | 17              | 11.31                   | 0.12         | ns              | N=25            | N=4                |
| TK22   | 1 mg/ml AOM   | 9.96 $\pm$ 0.46               | 17              | 3.02                    | 0.62         | ns              | N=49            | N=4                |
| TK22   | 2.5 mg/ml AOM | 10.97 $\pm$ 0.57              | 18              | 13.48                   | 0.12         | ns              | N=38            | N=1                |
| TK22   | 5 mg/ml AOM   | 9.79 $\pm$ 0.56               | 17              | 1.23                    | 0.56         | ns              | N=42            | N=4                |

*N2; Wild type , TK22 ; mev-1(kn1)*

The life span assay was carried out with wild type (N2) and *mev-1(kn-1)* worms at 20 °C P-value log rank as compared with control worms; mean life span in days is the average number of days the worms survived in each group. Each treatment was compared with the control by the non-parametric log rank (Mantel–Cox) test.
